# Supplementary material for: Experience shapes chandelier cell function and structure in the visual cortex
Source: eLife. 2024 Jan 9;12:RP91153. doi: 10.7554/eLife.91153 (PMC10963032; doi:10.7554/eLife.91153)
Supplement: Supplementary file 1. [file elife-91153-supp1.xlsx]

## Sheet: Sheet1
	Figure		Comparison	Parameter	Test	# mice	# sessions	N represents	Nr of neurons	p-val	Sign
	1	C	NA	Nr of starter cells (mean+-sem)	NA	4	NA	Starters	7.5 +- 3.8	NA	NA
		H	Ctrl/TTX/TTX+4-AP	Amplitude	RM Anova (Holm-Sidak's)			Neurons	11	0.0035	**
			Ctrl vs TTX	Amplitude	RM Anova (Holm-Sidak's)			Neurons	11	0.012	*
			TTX vs TTX+4-AP	Amplitude	RM Anova (Holm-Sidak's)			Neurons	11	0.008	**
	2	C	PyCs vs ChCs	Running speed correlation	LMEM-Anova	8	15	Neurons	1883 vs 95	<0.001	***
			PyCs vs ChCs	Pupil area correlation	LMEM-Anova	8	15	Neurons	1883 vs 95	<0.001	***
			PyCs vs ChCs	Within group correlation	LMEM-Anova	8	15	Neurons	1883 vs 95	<0.001	***
		E	PyC vs ChC	Response strength	LMEM-Anova	8	15	Neurons	1883 vs 95	0.2946	ns
		G	PyC vs ChC	OSI	LMEM-Anova	8	15	Neurons	1883 vs 95	<0.001	***
			PyC vs ChC	DSI	LMEM-Anova	8	15	Neurons	1883 vs 95	0.9629	ns
	3	B	Overall cell type	Response strength	LMEM-Anova	10	11	Neurons	2650	0.1461	ns
			L23 PyCs vs L5 PyCs	Response strength	LMEM-Tukey	4 vs 6	5 vs 6	Neurons	1015 vs 34	0.5922	ns
			L23 PyCs vs ChCs	Response strength	LMEM-Tukey	4 vs 4	5 vs 5	Neurons	1015 vs 1601	0.1847	ns
			L5 PyCs vs ChCs	Response strength	LMEM-Tukey	6 vs 4	6 vs 5	Neurons	34 vs 1601	0.9999	ns
		C	Overall cell type	Sparsity	LMEM-Anova	9	10	Neurons	2493	<0.001	***
			L23 PyCs vs L5 PyCs	Sparsity	LMEM-Tukey	4 vs 5	5 vs 5	Neurons	1015 vs 1444	0.3303	ns
			L23 PyCs vs ChCs	Sparsity	LMEM-Tukey	4 vs 4	5 vs 5	Neurons	1015 vs 34	<0.001	***
			L5 PyCs vs ChCs	Sparsity	LMEM-Tukey	5 vs 4	5 vs 5	Neurons	34 vs 1601	<0.001	***
		D	Overall cell type	Correlation between cells	LMEM-Anova	10	11	Neurons	2650	<0.001	***
			L23 PyCs vs L5 PyCs	Correlation between cells	LMEM-Tukey	4 vs 6	5 vs 6	Neurons	1015 vs 1601	<0.001	***
			L23 PyCs vs ChCs	Correlation between cells	LMEM-Tukey	4 vs 4	5 vs 5	Neurons	1015 vs 34	<0.001	***
			L5 PyCs vs ChCs	Correlation between cells	LMEM-Tukey	6 vs 4	6 vs 5	Neurons	34 vs 1601	<0.001	***
		E	L23 PyCs vs ChCs	Decoding accuracy	Permutation test	4	5	Neurons	34 vs 34	<0.001	***
		G	Overall cell type	OSI	LMEM-Anova	9	10	Neurons	2111	0.0025	**
			L23 PyCs vs L5 PyCs	OSI	LMEM-Tukey	4 vs 5	5 vs 5	Neurons	922 vs 1163	0.9999	ns
			L23 PyCs vs ChCs	OSI	LMEM-Tukey	4 vs 4	5 vs 5	Neurons	922 vs 26	0.0011	**
			L5 PyCs vs ChCs	OSI	LMEM-Tukey	5 vs 4	5 vs 5	Neurons	26 vs 1163	0.0034	**
		H	Overall cell type	Contrast sensitivity	LMEM-Anova	9	10	Neurons	2111	<0.001	***
			L23 PyCs vs L5 PyCs	Contrast sensitivity	LMEM-Tukey	4 vs 5	5 vs 5	Neurons	922 vs 1163	0.0037	**
			L23 PyCs vs ChCs	Contrast sensitivity	LMEM-Tukey	4 vs 4	5 vs 5	Neurons	922 vs 26	<0.001	***
			L5 PyCs vs ChCs	Contrast sensitivity	LMEM-Tukey	5 vs 4	5 vs 5	Neurons	26 vs 1163	<0.001	***
		I	Overall cell type	SF	LMEM-Anova	9	10	Neurons	2111	<0.001	***
			L23 PyCs vs L5 PyCs	SF	LMEM-Tukey	4 vs 5	5 vs 5	Neurons	922 vs 1163	<0.001	***
			L23 PyCs vs ChCs	SF	LMEM-Tukey	4 vs 4	5 vs 5	Neurons	922 vs 26	0.2679	ns
			L5 PyCs vs ChCs	SF	LMEM-Tukey	5 vs 4	5 vs 5	Neurons	26 vs 1163	0.0033	**
		J	Overall cell type	RF size	LMEM-Anova	9	10	Neurons	2081	0.0182	*
			L23 PyCs vs L5 PyCs	RF size	LMEM-Tukey	4 vs 5	5 vs 5	Neurons	908 vs 1147	0.2527	ns
			L23 PyCs vs ChCs	RF size	LMEM-Tukey	4 vs 4	5 vs 5	Neurons	908 vs 26	0.0304	*
			L5 PyCs vs ChCs	RF size	LMEM-Tukey	5 vs 4	5 vs 5	Neurons	26 vs 1147	0.7453	ns
	S2	B	Overall cell type	Oracle correlation	LMEM-Anova	10	11	Neurons	2650	<0.001	***
			L23 PyCs vs L5 PyCs	Oracle correlation	LMEM-Tukey	4 vs 6	5 vs 6	Neurons	1015 vs 34	<0.001	***
			L23 PyCs vs ChCs	Oracle correlation	LMEM-Tukey	4 vs 4	5 vs 5	Neurons	1015 vs 1601	<0.001	***
			L5 PyCs vs ChCs	Oracle correlation	LMEM-Tukey	6 vs 4	6 vs 5	Neurons	34 vs 1601	0.0177	*
		C	Overall cell type	Cross validation correlation	LMEM-Anova	10	11	Neurons	2650	<0.001	***
			L23 PyCs vs L5 PyCs	Cross validation correlation	LMEM-Tukey	4 vs 6	5 vs 6	Neurons	1015 vs 34	0.0062	**
			L23 PyCs vs ChCs	Cross validation correlation	LMEM-Tukey	4 vs 4	5 vs 5	Neurons	1015 vs 1601	<0.001	***
			L5 PyCs vs ChCs	Cross validation correlation	LMEM-Tukey	6 vs 4	6 vs 5	Neurons	34 vs 1601	0.0598	ns
	4	G	Overall cell type	Visual	LMEM-Anova	6	12	Neurons	1290	<0.001	***
			V vs NV	Visual	LMEM-Tukey	6	12	Neurons	546 vs 710	<0.001	***
			V vs ChC	Visual	LMEM-Tukey	6	12	Neurons	546 vs 34	<0.001	***
			NV vs ChC	Visual	LMEM-Tukey	6	12	Neurons	710 vs 34	<0.001	***
		H	Overall cell type	Non-visual	LMEM-Anova	6	12	Neurons	1290	<0.001	***
			V vs NV	Non-visual	LMEM-Tukey	6	12	Neurons	546 vs 710	<0.001	***
			V vs ChC	Non-visual	LMEM-Tukey	6	12	Neurons	546 vs 34	<0.001	***
			NV vs ChC	Non-visual	LMEM-Tukey	6	12	Neurons	710 vs 34	<0.001	***
		I	Overall cell type	Mismatch	LMEM-Anova	6	12	Neurons	1290	<0.001	***
			V vs NV	Mismatch	LMEM-Tukey	6	12	Neurons	546 vs 710	<0.001	***
			V vs ChC	Mismatch	LMEM-Tukey	6	12	Neurons	546 vs 34	<0.001	***
			NV vs ChC	Mismatch	LMEM-Tukey	6	12	Neurons	710 vs 34	<0.001	***
		J	Overall cell type	Locomotion onset	LMEM-Anova	6	12	Neurons	1290	<0.001	***
			V vs NV	Locomotion onset	LMEM-Tukey	6	12	Neurons	546 vs 710	<0.001	***
			V vs ChC	Locomotion onset	LMEM-Tukey	6	12	Neurons	546 vs 34	<0.001	***
			NV vs ChC	Locomotion onset	LMEM-Tukey	6	12	Neurons	710 vs 34	<0.001	***
		K	V vs NV	Correlation with ChCs	LMEM-Anova	6	12	Neurons	546 vs 710	<0.001	***
	S3	B	Overall cell type	Visual flow onset	LMEM-Anova	6	12	Neurons	1290	<0.001	***
			V vs NV	Visual flow onset	LMEM-Tukey	6	12	Neurons	546 vs 710	<0.001	***
			V vs ChC	Visual flow onset	LMEM-Tukey	6	12	Neurons	546 vs 34	<0.001	***
			NV vs ChC	Visual flow onset	LMEM-Tukey	6	12	Neurons	710 vs 34	<0.001	***
		F	Real vs permutation	Visual response (z-score)	Permutation test	6	12	Neurons	1290	<0.001	***
		L	Overall cell type	Visual	LMEM-Anova	2	4	Neurons	256	<0.001	***
			V vs NV	Visual	LMEM-Tukey	2	4	Neurons	104 vs 126	<0.001	***
			V vs ChC	Visual	LMEM-Tukey	2	4	Neurons	104 vs 26	<0.001	***
			NV vs ChC	Visual	LMEM-Tukey	2	4	Neurons	126 vs 26	<0.001	***
		M	Overall cell type	Non-visual	LMEM-Anova	2	4	Neurons	256	<0.001	***
			V vs NV	Non-visual	LMEM-Tukey	2	4	Neurons	104 vs 126	<0.001	***
			V vs ChC	Non-visual	LMEM-Tukey	2	4	Neurons	104 vs 26	<0.001	***
			NV vs ChC	Non-visual	LMEM-Tukey	2	4	Neurons	126 vs 26	<0.001	***
		N	Overall cell type	Mismatch	LMEM-Anova	2	4	Neurons	256	<0.001	***
			V vs NV	Mismatch	LMEM-Tukey	2	4	Neurons	104 vs 126	<0.001	***
			V vs ChC	Mismatch	LMEM-Tukey	2	4	Neurons	104 vs 26	<0.001	***
			NV vs ChC	Mismatch	LMEM-Tukey	2	4	Neurons	126 vs 26	<0.001	***
		O	Overall cell type	Locomotion onset	LMEM-Anova	2	4	Neurons	256	<0.001	***
			V vs NV	Locomotion onset	LMEM-Tukey	2	4	Neurons	104 vs 126	<0.001	***
			V vs ChC	Locomotion onset	LMEM-Tukey	2	4	Neurons	104 vs 26	<0.001	***
			NV vs ChC	Locomotion onset	LMEM-Tukey	2	4	Neurons	126 vs 26	<0.001	***
		P	Overall cell type	Visual flow onset	LMEM-Anova	2	4	Neurons	256	<0.001	***
			V vs NV	Visual flow onset	LMEM-Tukey	2	4	Neurons	104 vs 126	<0.001	***
			V vs ChC	Visual flow onset	LMEM-Tukey	2	4	Neurons	104 vs 26	<0.001	***
			NV vs ChC	Visual flow onset	LMEM-Tukey	2	4	Neurons	126 vs 26	0.0064	**
	5	D	Naive vs Trained PyC	Visual response strength	LMEM-Anova	5	8	Neurons	411	0.1764	ns
			Naive vs Trained ChC	Visual response strength	LMEM-Anova	5	8	Neurons	51	0.0145	*
		-	Naive vs Trained PyC	OSI	LMEM-Anova	5	8	Neurons	411	0.1316	ns
		-	Naive vs Trained PyC	DSI	LMEM-Anova	5	8	Neurons	411	0.9573	ns
		-	Naive vs Trained ChC	OSI	LMEM-Anova	5	8	Neurons	51	0.2199	ns
		-	Naive vs Trained ChC	DSI	LMEM-Anova	5	8	Neurons	51	0.9774	ns
		G	Naive vs Trained V-PyC	Visual response strength	LMEM-Anova	3	5	Neurons	68	0.9822	ns
			Naive vs Trained NV-PyC	Visual response strength	LMEM-Anova	3	5	Neurons	71	0.0246	*
	6	B	Naive vs Trained	Nr of boutons on all AIS	LMEM-Anova	5 vs 3		Neurons (AIS)	1802 vs 1007	0.1740	ns
		C	Naive vs Trained	Nr of boutons on contacted AIS	LMEM-Anova	5 vs 3		Neurons (AIS)	1200 vs 738	0.6545	ns
		D	Naive vs Trained	Fraction contacted	Chi-square	5 vs 3		Neurons (AIS)	1802 vs 1007	<0.001	***
		F	Naive vs Trained	AIS length	LMEM-Anova	5 vs 5		Neurons (AIS)	1802 vs 1556	0.0299	*
		G	Naive vs Trained	Density	LMEM-Anova	5 vs 3		Neurons (AIS)	1200 vs 738	0.0159	*
		I	Naive vs Trained	Distance from AIS base	LMEM-Anova	5 vs 3		Boutons	3906 vs 2587	<0.001	***
	7	B	ChC	dF/F	LMEM-Anova	12	12	Neurons	84	0.0023	**
			PyC	dF/F	LMEM-Anova	12	12	Neurons	1669	<0.001	***
		D	ChC	Intercept	LMEM-Anova	12	12	Neurons	84	<0.001	***
			PyC	Intercept	LMEM-Anova	12	12	Neurons	1669	<0.001	***
		E	ChC	Slope	LMEM-Anova	12	12	Neurons	84	<0.001	***
			PyC	Slope	LMEM-Anova	12	12	Neurons	1669	0.3124	ns
		H	ChC	dF/F	LMEM-Anova	7	7	Neurons	37	0.0977	ns
			PyC	dF/F	LMEM-Anova	7	7	Neurons	968	0.8794	ns
		J	ChC	Intercept	LMEM-Anova	7	7	Neurons	37	0.1232	ns
			PyC	Intercept	LMEM-Anova	7	7	Neurons	968	0.5448	ns
		K	ChC	Slope	LMEM-Anova	7	7	Neurons	37	0.5205	ns
			PyC	Slope	LMEM-Anova	7	7	Neurons	968	0.1231	ns
		-	PyC	Correlation (run mod vs ∆sig)	Corrcoef	12	12	Neurons	1669	0.7827	ns
		-	PyC	% increased (kord vs control)	Chi-square	12 vs 7	12 vs 7	Neurons	1669 vs 968	<0.001	***
		-	PyC	% decreased (kord vs control)	Chi-square	12 vs 7	12 vs 7	Neurons	1669 vs 968	<0.001	***
